# Supplementary material for: Linking physical activity to workers’ low back pain, back health, and theory-based psychological variables: study protocol of the workHealth intensive longitudinal observational study
Source: Springer Nature journal article supplement (doi:10.1186/s12889-025-21873-7), 2025-03-13
Supplement: MOESM1 [file 12889_2025_21873_MOESM1_ESM.pdf]

**Supplementary Table 1***Back Posture, Movement and Mobility (B-PMM) self-report questionnaire*

| Item | Englisch items                                                                                                                                              | Original item wording in German                                                                                                                                        | Domain        | Context      |
|------|-------------------------------------------------------------------------------------------------------------------------------------------------------------|------------------------------------------------------------------------------------------------------------------------------------------------------------------------|---------------|--------------|
| 1    | My back posture is very good.                                                                                                                               | Ich habe eine sehr gute Rückenhaltung.                                                                                                                                 | Back posture  | General      |
| 2    | I am very flexible in the back.                                                                                                                             | Ich bin sehr beweglich im Rücken.                                                                                                                                      | Back mobility | General      |
| 3    | The design of my workplace allows me to maintain a comfortable back posture (e.g., sufficient space, good adjustment of the furniture, suitable furniture). | Die Gestaltung meines Arbeitsplatzes erlaubt mir eine dauerhaft angenehme Rückenhaltung (z.B. ausreichend Platz, gute Einstellung des Mobiliars, geeignetes Mobiliar). | Back posture  | Work         |
| 4    | When I work, I pay attention to a posture that is gentle on my back.                                                                                        | Wenn ich arbeite, dann achte ich auf eine rückschonende Haltung.                                                                                                       | Back posture  | Work         |
| 5    | When I work, I pay attention to a health-promoting back posture.                                                                                            | Wenn ich arbeite, dann achte ich auf eine gesundheitsförderliche Rückenhaltung.                                                                                        | Back posture  | Work         |
| 6    | The design of my workplace allows me to move my back comfortably at all times (e.g., sufficient space, suitable furniture).                                 | Die Gestaltung meines Arbeitsplatzes erlaubt mir eine dauerhaft angenehme Bewegung im Rücken (z.B. ausreichend Platz, geeignetes Mobiliar).                            | Back movement | Work         |
| 7    | I regularly change my back posture during work (e.g., leaning back in the office chair, turning the shoulders, standing up).                                | Ich ändere regelmäßig meine Rückenposition während der Arbeit (z.B. im Bürostuhl nachhinten lehnen, Schultern kreisen, Aufstehen).                                     | Back movement | Work         |
| 8    | My work requires me to move my back (e.g., lifting things, walking around, instruct people on physical exercises).                                          | Meine Arbeit erfordert, dass ich meinen Rücken bewege (z.B. Dinge heben, Umhergehen, Personen zu körperlichen Übungen anleiten).                                       | Back movement | Work         |
| 9    | When I sit during my leisure-time, I pay attention to a posture that is gentle on my back.                                                                  | Wenn ich in der Freizeit sitze, dann achte ich auf eine rückschonende Haltung.                                                                                         | Back posture  | Leisure-time |
| 10   | When I sit during my leisure-time, I pay attention on a health-promoting back posture.                                                                      | Wenn ich in der Freizeit sitze, dann achte ich auf gesundheitsförderliche Rückenhaltung.                                                                               | Back posture  | Leisure-time |
| 11   | When I am active during my leisure-time (e.g., shopping, recreational sports), I pay attention to my back posture.                                          | Wenn ich in der Freizeit aktiv bin (z.B. Einkaufen, Freizeitsport), dann achte ich auf meine Rückenhaltung.                                                            | Back posture  | Leisure-time |
| 12   | When I am active during my leisure-time, my back is also in a lot of movement (e.g., twisting, bending, lifting).                                           | Wenn ich in der Freizeit aktiv bin, ist auch mein Rücken viel in Bewegung (z.B. Körperdrehungen, Beugen, Heben).                                                       | Back movement | Leisure-time |
| 13   | When I sit during my leisure-time, I regularly change my back posture (e.g., on the sofa).                                                                  | Wenn ich in der Freizeit sitze, dann ändere ich regelmäßig meine Rückenhaltung (z.B. auf dem Sofa).                                                                    | Back movement | Leisure-time |
